# Supplementary material for: Identification of two pathways mediating protein targeting from ER to lipid droplets
Source: PubMed Central journal article supplement (PMC9481466; doi:10.1038/s41556-022-00974-0), 2022-09-01

### Fig. 3c original blots

Anti-GPAT4 (predicted MW: 43.6 kDa)

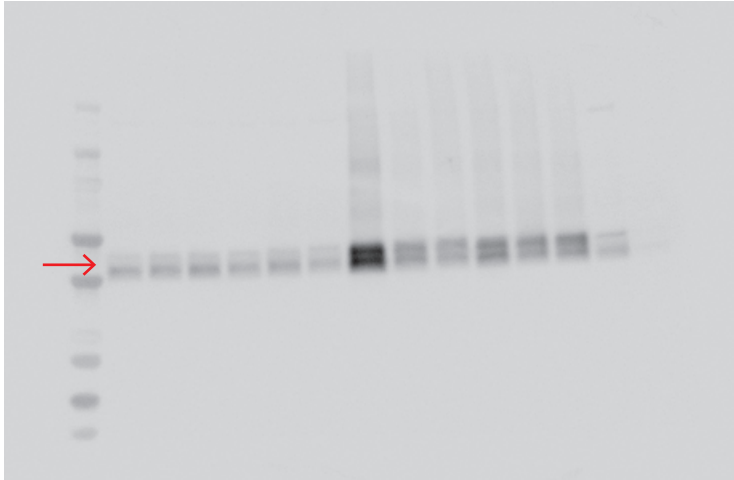

Ladder

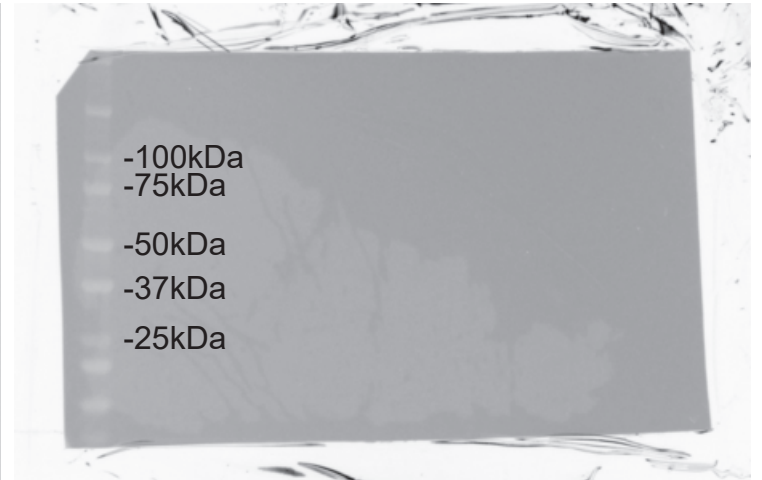

Anti- $\alpha$ -tubulin (predicted MW: 49.9 kDa)

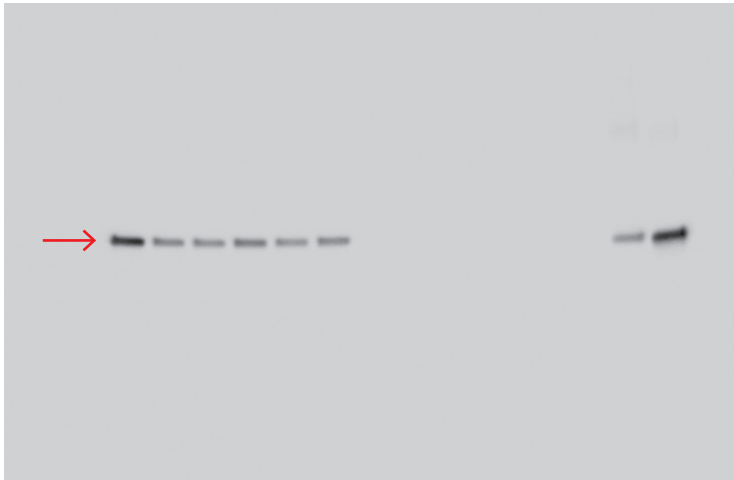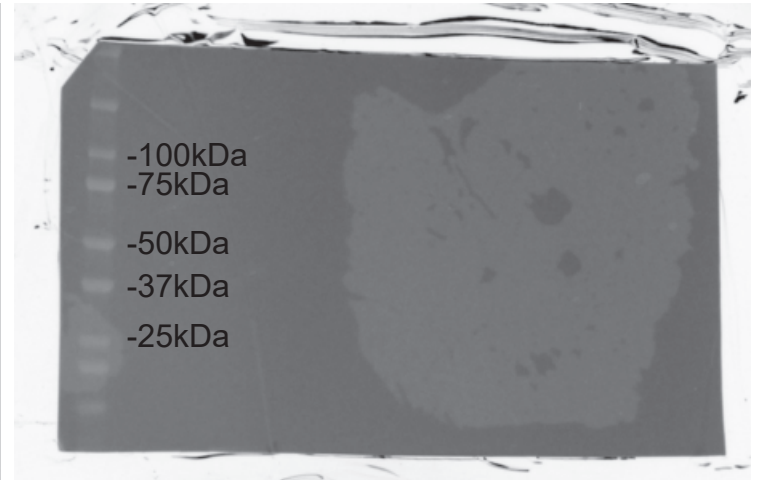

Anti-LDAH (predicted MW: 35.7 kDa); note  $\alpha$ -tubulin band from previously blotting around 50kDa

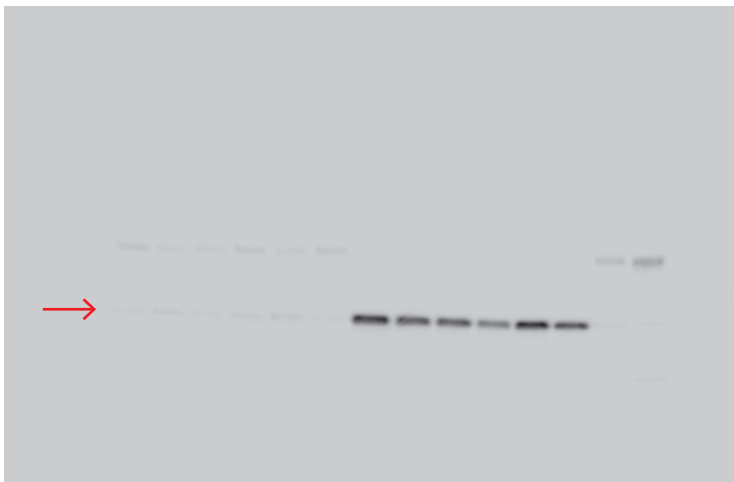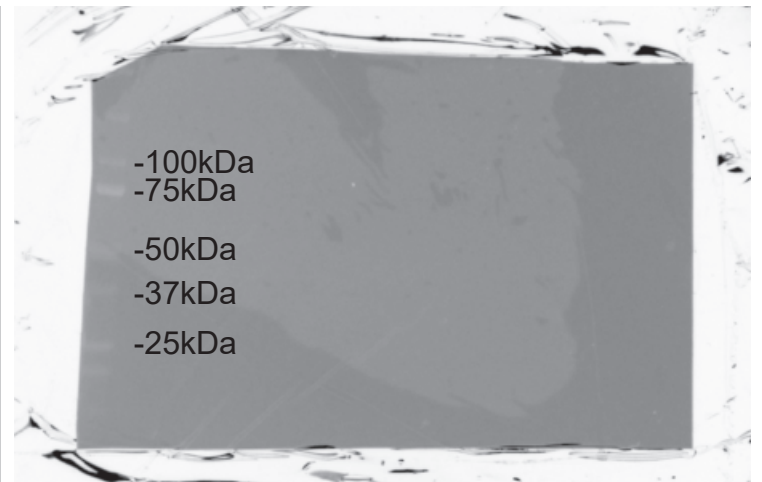

Supplement: 41556_2022_974_MOESM12_ESM.pdf [file 41556_2022_974_MOESM12_ESM.pdf]
