# Supplementary material for: Identification of two pathways mediating protein targeting from ER to lipid droplets
Source: PubMed Central journal article supplement (PMC9481466; doi:10.1038/s41556-022-00974-0), 2022-09-01

# Extended Data Fig. 5a original blots

Anti-GPAT4 (predicted MW: 43.6 kDa)

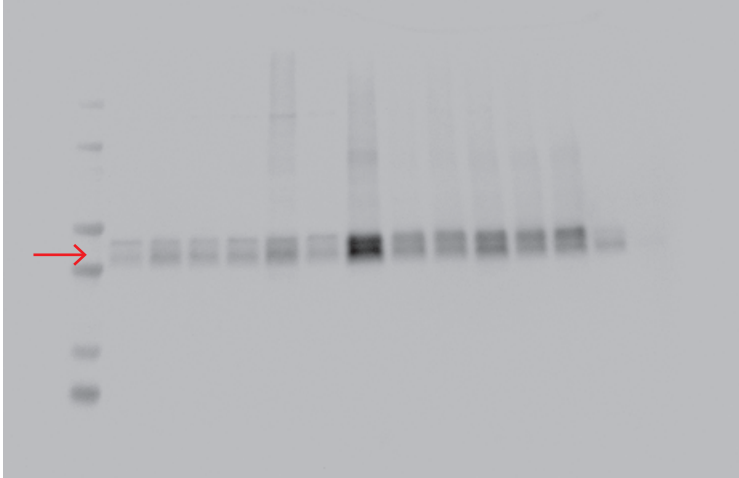

Ladder

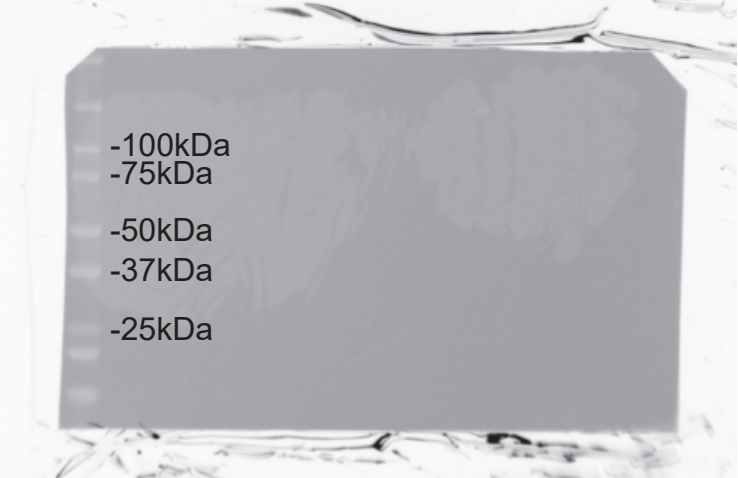

Anti-CNX99A (predicted MW: 75.9 kDa)

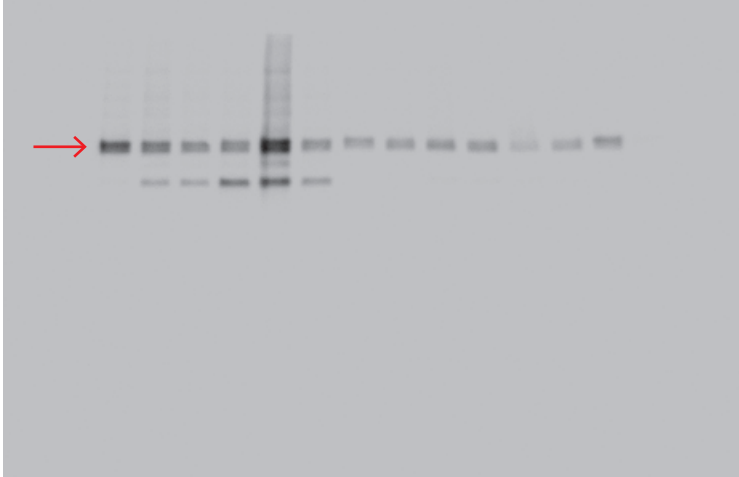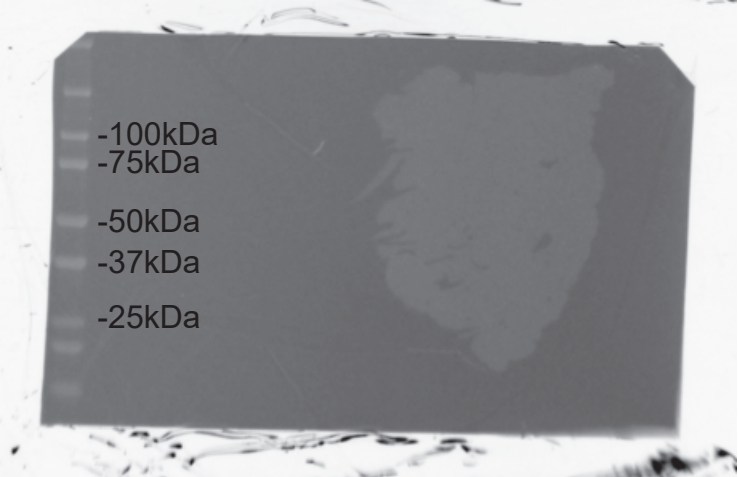

Supplement: 41556_2022_974_MOESM23_ESM.pdf [file 41556_2022_974_MOESM23_ESM.pdf]
